# Supplementary material for: Thematic analysis of illness narratives as an example of an approach to better understand the lived experience of women diagnosed with breast cancer in Spain
Source: HighWire-hosted journal article supplement (doi:10.1136/bmjopen-2022-060935), 2022-10-01
Supplement: bmjopen-2022-060935supp001_data_supplement.pdf [file bmjopen-2022-060935supp001_data_supplement.pdf]

**SCRIPT. INTERVIEWS ON HEALTH CONSULTATIONS TO PACIENTES WITH DIAGNOSIS OF BREAST CANCER**

Start interview on a cordial tone, do not go directly to the diagnosis

| <b>RUBIN Y RUBIN</b>                         | <b>TOPIC</b>                                                                                                                               | <b>QUESTION</b>                                                                                                                                                                                                                                                                 |
|----------------------------------------------|--------------------------------------------------------------------------------------------------------------------------------------------|---------------------------------------------------------------------------------------------------------------------------------------------------------------------------------------------------------------------------------------------------------------------------------|
| CREATION OF AN EASY (natural) INVOLVEMENT    | <ul style="list-style-type: none"> <li>• Age</li> <li>• Family group</li> <li>• Occupation</li> <li>• MOTIVATION TO PARTICIPATE</li> </ul> | <p>Can you please tell me a little about yourself?</p> <p>What has motivated you to participate in this interview?</p>                                                                                                                                                          |
| HONE CONVERSATIONAL COMPETENCE               | <ul style="list-style-type: none"> <li>• Aim of the research</li> </ul>                                                                    | <p>Overall, how would you describe the health consultations you had during your illness process?</p> <p>Did you notice any difference in the attention received by?</p> <ul style="list-style-type: none"> <li>• Physicians</li> <li>• Nurses</li> <li>• Technicians</li> </ul> |
| SHOW UNDERSTANDING AND EMOTIONAL INVOLVEMENT |                                                                                                                                            | <p>Regarding the health consultations:</p> <ul style="list-style-type: none"> <li>• What was good?</li> <li>• What was bad?</li> <li>• What was missing?</li> </ul>                                                                                                             |

|                          |                                                                                                                                                                                                                                                                                             |                                                                                                                                                                                                                                                                                               |
|--------------------------|---------------------------------------------------------------------------------------------------------------------------------------------------------------------------------------------------------------------------------------------------------------------------------------------|-----------------------------------------------------------------------------------------------------------------------------------------------------------------------------------------------------------------------------------------------------------------------------------------------|
| GATHERING OF BASIC FACTS | ILLNESS TRAJECTORY                                                                                                                                                                                                                                                                          | Do you know which type of breast cancer you had?<br>Which treatment did you receive?<br>Can you please tell me about the diagnosis process?                                                                                                                                                   |
|                          | ABOUT SPECIFIC HEALTH INTERACTIONS <ul style="list-style-type: none"> <li>• Family doctor</li> <li>• Gynaecologist</li> <li>• Oncologist</li> <li>• Surgeons</li> <li>• Chemotherapy nurses</li> <li>• Radiotherapy technicians</li> <li>• Administrative staff</li> <li>• Other</li> </ul> | Is there a specific health consultation you would like to talk about?<br><br>Did you feel your opinion was considered in the process of decision-making? Where you allowed/invited to actively participate?                                                                                   |
|                          | INFORMATION                                                                                                                                                                                                                                                                                 | How would you rate the information you received? <ul style="list-style-type: none"> <li>• Quantity</li> <li>• Quality</li> <li>• The way it was delivered</li> <li>• The timing</li> <li>• The place</li> </ul><br>Did you feel you were “in good hands? Do you trust the staff treating you? |

|                     |                                                                      |                                                                                                                                                                                                                                                                                                                                                                                                                                                                                                                                                                                                                                                                                |
|---------------------|----------------------------------------------------------------------|--------------------------------------------------------------------------------------------------------------------------------------------------------------------------------------------------------------------------------------------------------------------------------------------------------------------------------------------------------------------------------------------------------------------------------------------------------------------------------------------------------------------------------------------------------------------------------------------------------------------------------------------------------------------------------|
|                     |                                                                      | <p>Where else did you look for information?</p> <ul style="list-style-type: none"> <li>• Social networks</li> <li>• Internet</li> <li>• Cancer associations</li> <li>• Support groups / friends</li> </ul>                                                                                                                                                                                                                                                                                                                                                                                                                                                                     |
| DIFFICULT QUESTIONS | LIVING WITH THE DIAGNOSIS OF CANCER / SECONDARY EFFECTS / SUURVIVING | <p>How did the diagnosis of cancer impact your life?</p> <ul style="list-style-type: none"> <li>• On a personal level</li> <li>• At work</li> <li>• Within your family circle.</li> </ul> <p>Did you receive any kind of support from the heath staff to get through these changes?</p> <p>Can we talk about the secondary effects of the treatments and how they impacted on your life?</p> <ul style="list-style-type: none"> <li>• Hair loss</li> <li>• Scars</li> <li>• Loss of breast(s)</li> <li>• Sexuality</li> <li>• Fertility</li> <li>• Self-steam</li> <li>• Digestive symptoms, fatigue, etc</li> <li>• Effects of radiotherapy: tattoos, skin lesions</li> </ul> |

|                                   |                      |                                                                                                                                                                                                                                                                                                                                                                                                                                  |
|-----------------------------------|----------------------|----------------------------------------------------------------------------------------------------------------------------------------------------------------------------------------------------------------------------------------------------------------------------------------------------------------------------------------------------------------------------------------------------------------------------------|
|                                   |                      | <p>Currently, what does having had cancer means to you?<br/>Are you still being followed-up? Do you think the timing between follow-ups is good?</p> <p><b>COULD YOU PLEASE TELL ME HOW DO YOU ENVISION THE IDEAL HEALTH CONSULTATION?</b> (What advice would you give students)</p>                                                                                                                                             |
| CALMING DOWN THE EMOTIONAL TONE   | CONCILIATION METHODS | <p>Brief summary of the last answer</p> <ul style="list-style-type: none"> <li>• Do you think you have changed after the diagnosis?</li> <li>• Do you think there has been a learning?</li> <li>• Did you carry out any therapeutic activity? (Writing, reading, dancing, theatre, singing)</li> <li>• Have you considered writing a book about your illness?</li> <li>• Do you have an explanation for your illness?</li> </ul> |
| CONCLUDE, WITHOUT LOOSING CONTACT |                      | <p>Is there something else you would like to share with me? Something I did not ask but you would like to tell me?</p> <p>Acknowledgements.</p>                                                                                                                                                                                                                                                                                  |
